# Supplementary material for: Preparation of TFC Membranes Supported with Elelctrospun Nanofibers for Desalination by Forward Osmosis
Source: Copernicus journal article supplement (doi:10.5194/dwes-2020-9), 2020-03-31
Supplement: Supplementary file [file dwes-2020-9-AC3-supplement.pdf]

Dear Dr. Heijman,

We appreciate your comment; we also agree that the FO process still needs further investigation to develop a feasible and economical setup integration. As you mentioned, RO is reliable to produce large amounts of desalinated water, however, it went through many stages to be as it is known today. This included studying the membrane, process, set up, energy consumption, etc. Here, FO needs more investigation to upgrade to the next steps.

Best,

Kadhom
